# Supplementary material
Source: publisher figshare collection journal article supplement (https://brill.figshare.com/articles/dataset/_/24382546)
Supplement: Supplementary file 1 [file 1]

*Matjaž Kuntner* | ORCID: 0000-0002-0057-2178

Jovan Hadži Institute of Biology, Research Centre of the Slovenian, Academy of Sciences and Arts, 1000 Ljubljana, Slovenia;

Department of Organisms and Ecosystems Research, National Institute of Biology, 1000 Ljubljana, Slovenia

*Cene Fišer* | ORCID: 0000-0003-1982-8724

SubBio Lab, Department of Biology, Biotechnical Faculty, University of Ljubljana, 1000 Ljubljana, Slovenia

### **Supplementary material**

ALIGNMENT S1      Fasta file of COI sequences used in our analyses.

ALIGNMENT S2      Fasta file of 28S rRNA sequences used in our analyses.

ALIGNMENT S3      Nexus matrix of concatenated COI and 28S rRNA sequences.











TABLE S1 Primer details with targeted gene, primer names (F: forward; R: reverse) and sequences, and reference information.

| Gene | Primer<br>F (Forward),<br>R (Reverse) | Sequence                                                                | Reference                                        |
|------|---------------------------------------|-------------------------------------------------------------------------|--------------------------------------------------|
| COI  | F: LCO-1490<br><br>R: HCO-2198        | 5'GGTCAACAAATCATAAAGATATTGG-3'<br><br>(5'TAAACTTCAGGGTGACCAAAAAATCA-3') | Folmer et al., 1994;<br><br>Simon et al., 1994   |
| 28S  | F: 28Sa<br><br>R: 28Sb                | TTGGCGACCCGCAATTTAAGCAT<br><br>CCTGAGGGAACTTCGGAGGGAAC                  | Cristescu & Hebert 2005;<br><br>Hou et al., 2007 |
| 28S  | F:28SF<br><br>R: 28SR                 | TTAGTAGGGGCGACCGAACAGGGAT<br><br>GTCTTTCGCCCCTATGCCCAACTGA              | Hou et al., 2007                                 |

TABLE S2 PCR amplification protocols.

| COI           | 28S             |
|---------------|-----------------|
| 94°C: 1 min   | 94°C: 1 min     |
| 5 cycles      | 35 cycles       |
| 94°C: 30 s    | 94°C (30 s),    |
| 45°C: 90 s    | 45-50°C (45 s), |
| 72°C: 1 min   | 72°C (1 min).   |
| 35 cycles:    |                 |
| 94°C: 30 s    |                 |
| 51°C: 90 s    |                 |
| 72°C: 1 min   |                 |
| 72°C (5 min). | 72°C (5 min).   |
| 4°C: ∞        | 4°C: ∞          |
